# Supplementary material for: Shifting Trends and Persistent Disparities in Mortality Related to Liver Cirrhosis and Respiratory Disease: A Population-Based Study in the United States, 1999-2023
Source: Research Square preprint supplement (doi:10.21203/rs.3.rs-7647383/v1), 2025-10-10
Supplement: Supplementary file 1 [file a8eacddf8d42aad02b8b5dcb.docx]

**Supplementary material**

**Table S1:** Age-adjusted mortality rates (AAMR) and annual average percent changes (AAPC) of liver cirrhosis and respiratory diseases-related mortality stratified by sex, age, ethnocracies, and geographic in the United States in 1999 and 2023.

| **Measure** | **Deaths_1999** | **Deaths_2023** | **AAMR_1999 (95% CI)** | **AAMR_2023 (95% CI)** | **APC** | **AAPC (95% CI)** |
| --- | --- | --- | --- | --- | --- | --- |
| Both | 249094 | 305629 | 141.31 (140.75 to 141.86) | 111.04 (110.64 to 111.44) | 22.70 | -1.06 (-1.40 to -0.72*) |
| Female | 125322 | 149572 | 115.89 (115.24 to 116.53) | 97.26 (96.76 to 97.76) | 19.35 | -0.66 (-0.82 to -0.50*) |
| Male | 123772 | 156057 | 182.18 (181.14 to 183.21) | 128.31 (127.66 to 128.96) | 26.08 | -1.43 (-1.74 to -1.12*) |
| 25-34 years | 1248 | 2295 | 3.11 (3.11 to 3.11) | 5.04 (5.04 to 5.04) | 83.89 | 2.14 (0.45 to 3.86*) |
| 35-44 years | 4937 | 6438 | 10.95 (10.95 to 10.95) | 14.50 (14.50 to 14.50) | 30.40 | 1.06 (-0.60 to 2.74) |
| 45-54 years | 11116 | 13958 | 30.39 (30.39 to 30.39) | 34.47 (34.47 to 34.47) | 25.57 | 0.49 (-0.28 to 1.27) |
| 55-64 years | 21311 | 39832 | 89.62 (89.62 to 89.62) | 95.17 (95.17 to 95.17) | 86.91 | 0.30 (-0.20 to 0.80) |
| 65-74 years | 51923 | 74697 | 281.90 (281.90 to 281.90) | 215.36 (215.36 to 215.36) | 43.86 | -1.04 (-1.29 to -0.79*) |
| 75-84 years | 85671 | 92410 | 700.79 (700.79 to 700.79) | 503.10 (503.10 to 503.10) | 7.87 | -1.40 (-1.66 to -1.15*) |
| 85+ years | 72888 | 75999 | 1754.64 (1754.64 to 1754.64) | 1226.78 (1226.78 to 1226.78) | 4.27 | -1.56 (-1.80 to -1.32*) |
| Hispanic | 8819 | 23004 | 103.62 (101.33 to 105.91) | 79.37 (78.31 to 80.43) | 160.85 | -1.16 (-1.43 to -0.89*) |
| NH Black | 19101 | 26110 | 127.86 (126.02 to 129.70) | 95.42 (94.23 to 96.61) | 36.69 | -0.99 (-1.38 to -0.60*) |
| NH White | 216550 | 244696 | 145.28 (144.67 to 145.89) | 121.91 (121.41 to 122.40) | 13.00 | -0.80 (-1.16 to -0.45*) |
| NH Other | 3817 | 10852 | 85.75 (82.88 to 88.62) | 56.72 (55.64 to 57.80) | 184.31 | -1.81 (-2.09 to -1.53*) |
| Alabama | 4660 | 6395 | 162.38 (157.72 to 167.05) | 149.47 (145.73 to 153.20) | 37.23 | -0.33 (-0.82 to 0.17) |
| Alaska | 249 | 523 | 147.26 (127.37 to 167.14) | 112.75 (102.62 to 122.87) | 110.04 | -1.10 (-1.50 to -0.70*) |
| Arizona | 4941 | 7108 | 156.41 (152.03 to 160.79) | 109.61 (107.01 to 112.21) | 43.86 | -1.29 (-1.67 to -0.90*) |
| Arkansas | 2726 | 4204 | 145.48 (140.01 to 150.94) | 163.52 (158.50 to 168.54) | 54.22 | 0.43 (0.24 to 0.63*) |
| California | 22673 | 28312 | 124.46 (122.84 to 126.08) | 94.37 (93.26 to 95.48) | 24.87 | -1.33 (-1.98 to -0.67*) |
| Colorado | 3468 | 4764 | 163.72 (158.24 to 169.20) | 112.16 (108.93 to 115.40) | 37.37 | -1.36 (-1.52 to -1.19*) |
| Connecticut | 3229 | 3123 | 130.56 (126.05 to 135.08) | 95.80 (92.39 to 99.22) | -3.28 | -1.46 (-1.69 to -1.23*) |
| Delaware | 679 | 909 | 139.13 (128.62 to 149.65) | 95.72 (89.30 to 102.13) | 33.87 | -1.27 (-1.61 to -0.93*) |
| District of Columbia | 409 | 302 | 113.37 (102.38 to 124.36) | 68.25 (60.51 to 75.99) | -26.16 | -1.70 (-2.09 to -1.31*) |
| Florida | 16780 | 21499 | 124.97 (123.06 to 126.87) | 93.30 (92.03 to 94.58) | 28.12 | -1.22 (-1.53 to -0.91*) |
| Georgia | 6603 | 10117 | 164.68 (160.69 to 168.68) | 127.71 (125.18 to 130.24) | 53.22 | -1.00 (-1.36 to -0.63*) |
| Hawaii | 764 | 1093 | 98.77 (91.75 to 105.80) | 75.02 (70.46 to 79.58) | 43.06 | -1.17 (-2.16 to -0.16*) |
| Idaho | 1093 | 1654 | 147.45 (138.71 to 156.19) | 107.30 (102.03 to 112.57) | 51.33 | -0.84 (-1.13 to -0.55*) |
| Illinois | 11046 | 10723 | 142.93 (140.26 to 145.59) | 103.68 (101.69 to 105.67) | -2.92 | -0.93 (-1.11 to -0.76*) |
| Indiana | 5690 | 7840 | 149.01 (145.14 to 152.88) | 142.90 (139.70 to 146.11) | 37.79 | -0.01 (-0.19 to 0.18) |
| Iowa | 3359 | 3238 | 144.07 (139.16 to 148.98) | 115.41 (111.37 to 119.46) | -3.60 | -0.61 (-0.83 to -0.40*) |
| Kansas | 2663 | 3090 | 141.98 (136.56 to 147.40) | 128.96 (124.35 to 133.57) | 16.03 | -0.28 (-0.49 to -0.07*) |
| Kentucky | 4604 | 6223 | 182.18 (176.91 to 187.45) | 167.64 (163.39 to 171.88) | 35.17 | -0.36 (-0.82 to 0.10) |
| Louisiana | 3527 | 4542 | 137.38 (132.84 to 141.93) | 124.34 (120.66 to 128.02) | 28.78 | -0.20 (-0.44 to 0.04) |
| Maine | 1374 | 1709 | 148.45 (140.60 to 156.30) | 120.58 (114.69 to 126.46) | 24.38 | -0.86 (-1.14 to -0.58*) |
| Maryland | 4265 | 4198 | 141.52 (137.26 to 145.78) | 83.94 (81.37 to 86.51) | -1.57 | -2.01 (-2.18 to -1.85*) |
| Massachusetts | 6687 | 5992 | 149.03 (145.45 to 152.61) | 98.79 (96.26 to 101.32) | -10.39 | -2.02 (-2.64 to -1.39*) |
| Michigan | 8855 | 9691 | 144.24 (141.24 to 147.25) | 111.60 (109.33 to 113.88) | 9.44 | -0.98 (-1.43 to -0.53*) |
| Minnesota | 3913 | 4219 | 123.15 (119.28 to 127.02) | 88.21 (85.51 to 90.91) | 7.82 | -1.26 (-1.97 to -0.53*) |
| Mississippi | 2735 | 3910 | 157.74 (151.83 to 163.66) | 163.55 (158.33 to 168.77) | 42.96 | 0.21 (-0.36 to 0.78) |
| Missouri | 6086 | 7078 | 157.78 (153.82 to 161.75) | 133.53 (130.37 to 136.69) | 16.30 | -0.59 (-1.24 to 0.06) |
| Montana | 1042 | 1238 | 169.13 (158.85 to 179.40) | 123.76 (116.69 to 130.84) | 18.81 | -1.17 (-1.43 to -0.90*) |
| Nebraska | 1836 | 1933 | 149.39 (142.51 to 156.26) | 122.68 (117.13 to 128.22) | 5.28 | -0.48 (-1.21 to 0.26) |
| Nevada | 1744 | 2923 | 172.28 (163.93 to 180.62) | 116.71 (112.39 to 121.02) | 67.60 | -1.48 (-1.79 to -1.16*) |
| New Hampshire | 1006 | 1454 | 133.77 (125.50 to 142.04) | 110.89 (105.05 to 116.72) | 44.53 | -0.85 (-1.15 to -0.55*) |
| New Jersey | 7085 | 7041 | 125.96 (123.03 to 128.89) | 90.11 (87.99 to 92.24) | -0.62 | -1.49 (-2.07 to -0.90*) |
| New Mexico | 1646 | 2628 | 159.22 (151.50 to 166.94) | 149.23 (143.35 to 155.12) | 59.66 | 0.05 (-0.39 to 0.49) |
| New York | 15855 | 15925 | 127.45 (125.47 to 129.44) | 92.08 (90.63 to 93.54) | 0.44 | -1.17 (-1.34 to -1.00*) |
| North Carolina | 7343 | 10896 | 153.88 (150.35 to 157.41) | 124.61 (122.23 to 126.99) | 48.39 | -0.90 (-1.06 to -0.74*) |
| North Dakota | 585 | 674 | 116.81 (107.24 to 126.38) | 109.18 (100.73 to 117.63) | 15.21 | 0.02 (-0.34 to 0.38) |
| Ohio | 11216 | 13209 | 148.59 (145.84 to 151.34) | 130.22 (127.96 to 132.48) | 17.77 | -0.30 (-0.48 to -0.12*) |
| Oklahoma | 3655 | 4942 | 158.96 (153.81 to 164.12) | 157.40 (152.95 to 161.85) | 35.21 | -0.10 (-0.33 to 0.12) |
| Oregon | 3099 | 3728 | 136.20 (131.40 to 141.00) | 100.80 (97.50 to 104.10) | 20.30 | -1.26 (-1.40 to -1.12*) |
| Pennsylvania | 13051 | 13106 | 135.71 (133.37 to 138.04) | 108.42 (106.53 to 110.31) | 0.42 | -0.86 (-1.04 to -0.67*) |
| Rhode Island | 1033 | 970 | 130.44 (122.45 to 138.42) | 98.43 (92.11 to 104.75) | -6.10 | -1.38 (-1.63 to -1.13*) |
| South Carolina | 3612 | 5736 | 152.42 (147.42 to 157.42) | 124.57 (121.26 to 127.87) | 58.80 | -0.77 (-1.33 to -0.21*) |
| South Dakota | 726 | 882 | 126.92 (117.61 to 136.23) | 120.82 (112.62 to 129.01) | 21.49 | 0.08 (-0.26 to 0.43) |
| Tennessee | 5741 | 8292 | 162.74 (158.52 to 166.95) | 145.01 (141.83 to 148.19) | 44.43 | -0.65 (-1.15 to -0.14*) |
| Texas | 15170 | 23296 | 145.47 (143.14 to 147.79) | 118.08 (116.54 to 119.62) | 53.57 | -0.80 (-0.92 to -0.69*) |
| Utah | 1269 | 1878 | 133.16 (125.81 to 140.50) | 98.44 (93.92 to 102.97) | 47.99 | -1.16 (-2.15 to -0.15*) |
| Vermont | 567 | 585 | 142.92 (131.15 to 154.69) | 94.21 (86.34 to 102.07) | 3.17 | -1.67 (-1.97 to -1.37*) |
| Virginia | 5947 | 7342 | 150.95 (147.10 to 154.80) | 104.83 (102.40 to 107.25) | 23.46 | -1.48 (-1.63 to -1.33*) |
| Washington | 5061 | 6000 | 147.08 (143.03 to 151.14) | 98.57 (96.04 to 101.10) | 18.55 | -1.34 (-1.58 to -1.11*) |
| West Virginia | 2401 | 2775 | 175.49 (168.46 to 182.52) | 162.37 (156.17 to 168.57) | 15.58 | -0.06 (-0.25 to 0.13) |
| Wisconsin | 4759 | 5051 | 129.92 (126.23 to 133.62) | 98.78 (96.00 to 101.56) | 6.14 | -1.12 (-1.60 to -0.63*) |
| Wyoming | 567 | 669 | 197.14 (180.88 to 213.41) | 136.66 (126.04 to 147.28) | 17.99 | -0.89 (-1.21 to -0.57*) |
| Northeast | 49887 | 49905 | 133.07 (131.90 to 134.24) | 98.07 (97.20 to 98.94) | 0.04 | -1.35 (-1.83 to -0.87*) |
| Midwest | 60734 | 67628 | 143.35 (142.21 to 144.49) | 116.54 (115.65 to 117.44) | 11.35 | -0.62 (-1.01 to -0.23*) |
| South | 90857 | 125578 | 147.20 (146.24 to 148.15) | 119.68 (119.01 to 120.35) | 38.21 | -0.89 (-1.22 to -0.56*) |
| West | 47616 | 62518 | 136.68 (135.45 to 137.90) | 101.32 (100.51 to 102.12) | 31.30 | -1.44 (-1.72 to -1.15*) |
| Metropolitan | 197853 | 247808 | 138.64 (138.03 to 139.25) | 110.73 (110.29 to 111.17) | 25.25 | -1.04 (-1.34 to -0.74*) |
| Nonmetropolitan | 51241 | 65419 | 152.64 (151.32 to 153.97) | 150.97 (149.78 to 152.16) | 27.67 | 0.12 (-0.06 to 0.30) |

AAMR, age-adjusted mortality rate; APC, annual percent change; AAPC, average annual percent change; CI, confidence interval.


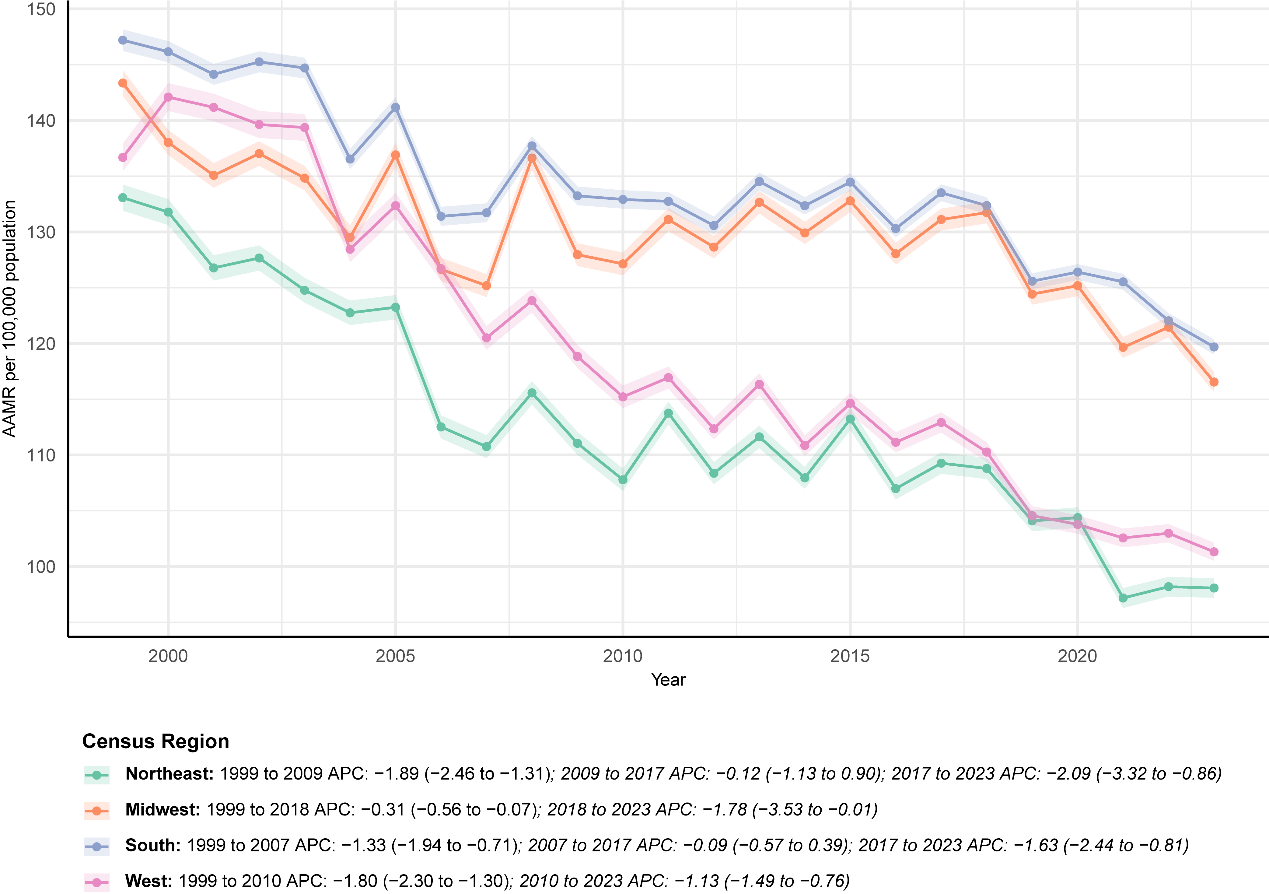


**Fig S1.** Census region stratified liver cirrhosis and respiratory diseases-related AAMR per 100,000 in the United States from 1999 to 2023. *Indicates that the APC is significantly different from zero at α = 0.05. AAMR, age-adjusted mortality rate; APC, annual percent change; CI, confidence interval.


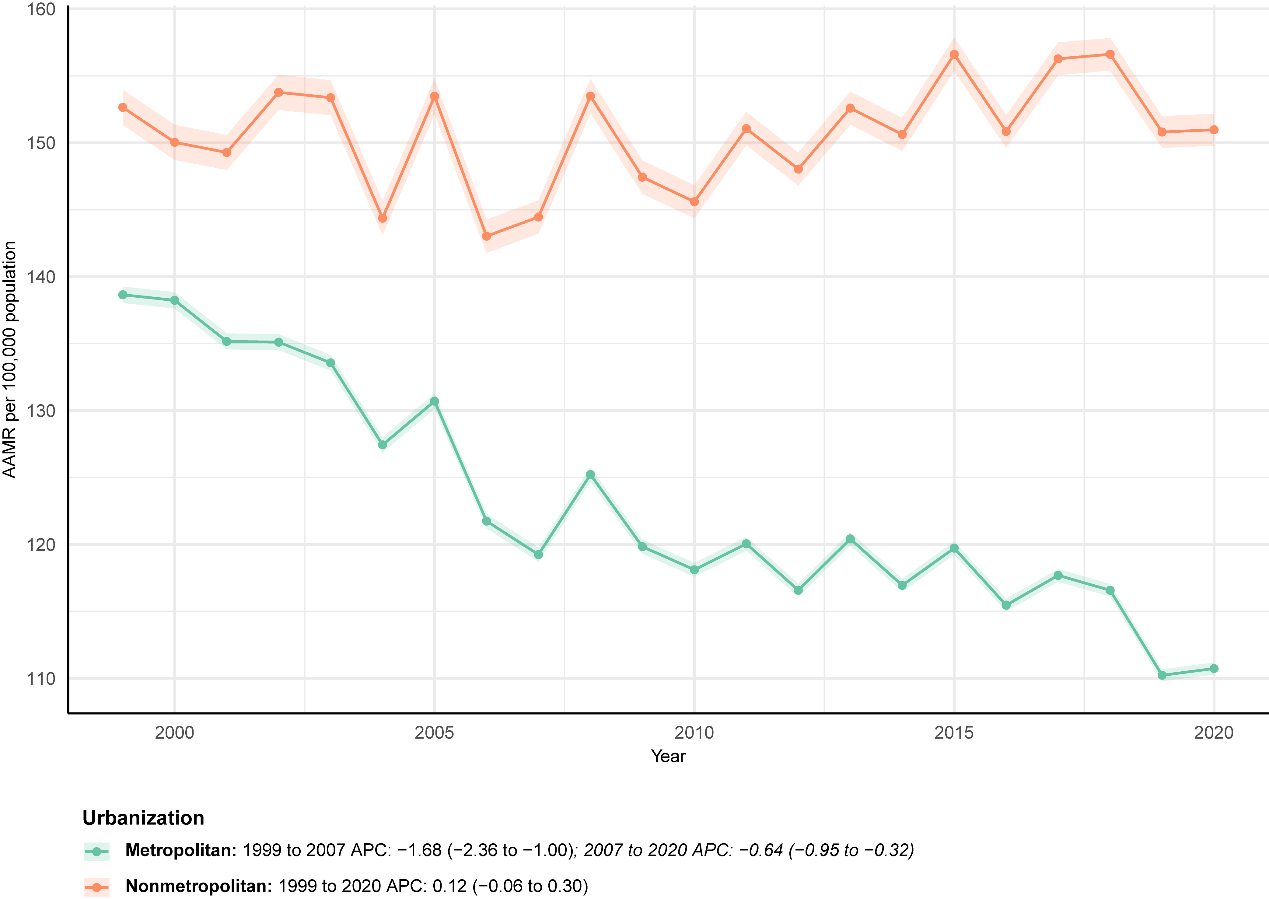


**Fig S2.** Urbanization stratified liver cirrhosis and respiratory diseases-related AAMR per 100,000 in the United States from 1999 to 2023. *Indicates that the APC is significantly different from zero at α = 0.05. AAMR, age-adjusted mortality rate; APC, annual percent change; CI, confidence interval.
